# Supplementary material
Source: PubMed Central journal article supplement (PMC3920848)
Supplement: Supp_Fig1.pdf [file Supp_Fig1.pdf]

## Supplementary Data

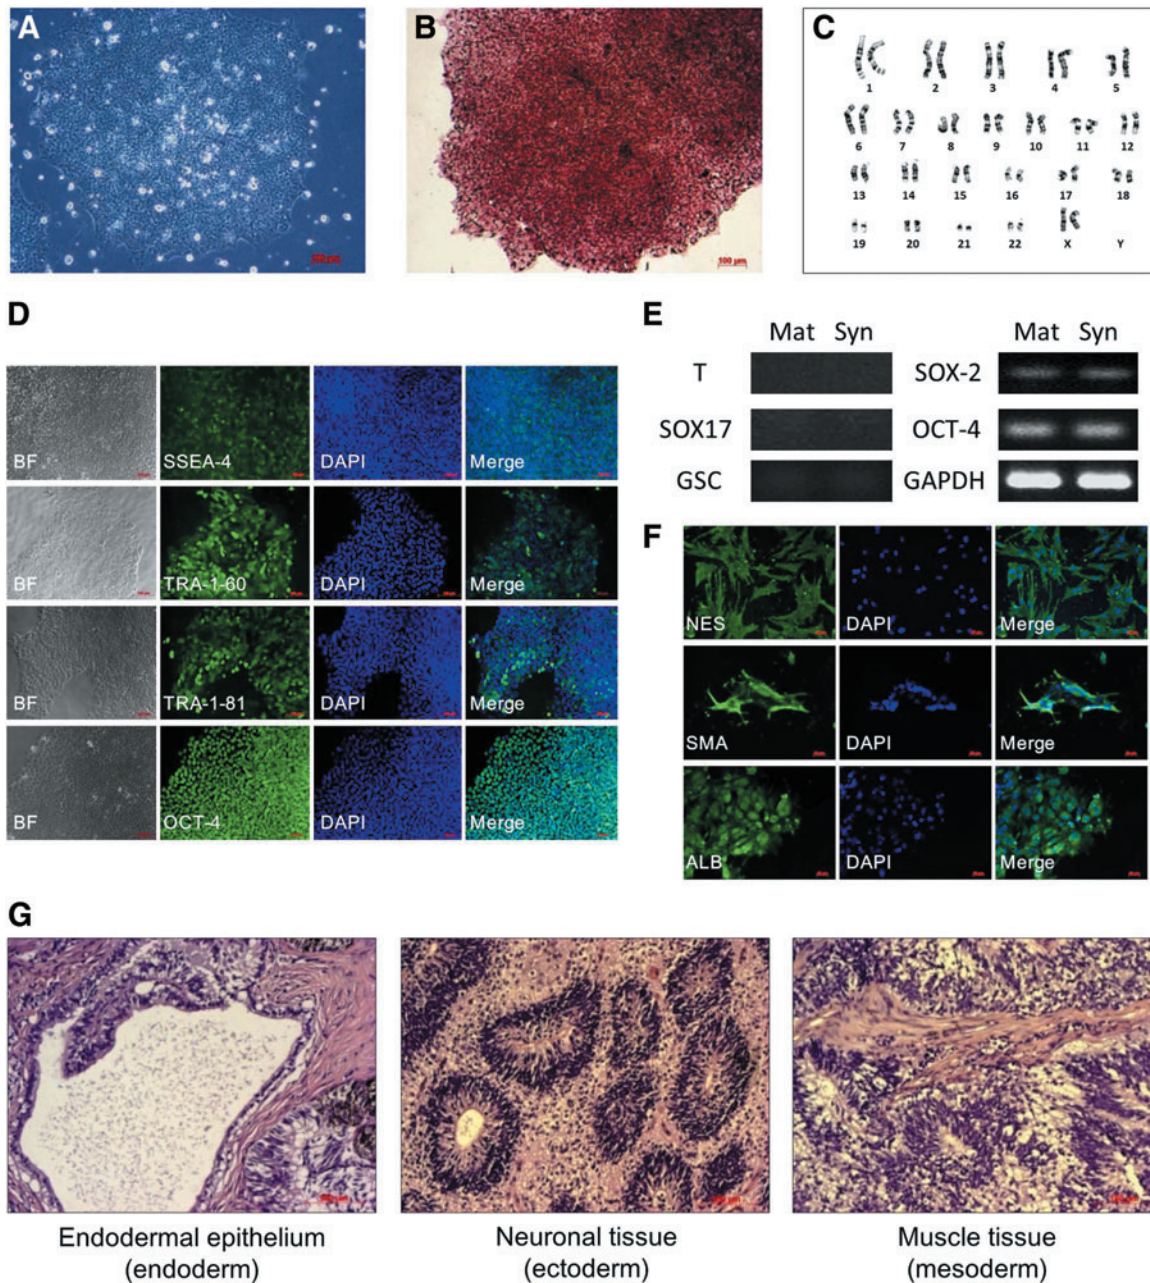

**SUPPLEMENTARY FIG. S1.** Long-term culture of human embryonic stem cells (hESCs) on a synthetic surface. **(A)** Cell morphology of hESCs grown on the Synthemax surface in the mTeSR medium after 10 passages of subculture. **(B)** Staining of alkaline phosphatase activity. **(C)** The cells maintained the normal karyotype after 10 passages of subculture. **(D)** The cells expressed the pluripotent surface markers of SSEA-4, TRA-1-60, and TRA-1-81 and nuclear marker of OCT-4. **(E)** RT-PCR analysis showing that the cells expressed the hESC markers such as *SOX-2* and *OCT-4* and did not express the early differentiation markers such as *Brachyury (T)*, *SOX17*, and *Goosecoid (GSC)* following the 3-day induction. **(F)** The differentiated embryoid bodies expressed Nestin (NES; ectoderm), smooth muscle actin (SMA; mesoderm), and albumin (ALB; endoderm) markers. Hoechst counterstaining was shown for nuclear portion. **(G)** Teratoma formation in severe combined immunodeficient mice after transplantation of hESCs contained tissues representing all three germ layers, endodermal epithelium (endoderm), neuronal tissue (ectoderm), and muscle tissue (mesoderm). Scale bar: 100  $\mu$ m (**A**, **B**, **D**, **F**), 50  $\mu$ m (**E**).
