# Supplementary material
Source: PubMed Central journal article supplement (PMC3920848)
Supplement: Supp_Table1.pdf [file Supp_Table1.pdf]

SUPPLEMENTARY TABLE S1. PRIMARY ANTIBODY LIST

| <i>Antibody</i> | <i>Company</i> | <i>IgG species</i> | <i>Dilution</i> |
|-----------------|----------------|--------------------|-----------------|
| SSEA-4          | Abcam          | Mouse IgG          | 1:100           |
| TRA-1-60        | Abcam          | Mouse IgM          | 1:200           |
| TRA-1-81        | Abcam          | Mouse IgM          | 1:200           |
| OCT-4           | Abcam          | Rabbit IgG         | 1:400           |
| $\beta$ -TUB    | Sigma          | Mouse IgG          | 1:400           |
| NES             | R&D Systems    | Mouse IgG          | 1:100           |
| SMA             | Abcam          | Mouse IgG          | 1:100           |
| ALB             | Abcam          | Goat IgG           | 1:200           |
| SOX17           | R&D Systems    | Goat IgG           | 1:200           |
| PDX1            | R&D Systems    | Goat IgG           | 1:100           |
| SOX9            | Abnova         | Mouse IgG          | 1:400           |
| INS             | Novus          | Mouse IgG          | 1:400           |
| C-Pep           | Abcam          | Rabbit IgG         | 1:5,000         |
